# Supplementary material for: Polydopamine-Functionalized Copper Peroxide/ZIF-8 Nanoparticle-Based Fluorescence-Linked Immunosorbent Assay for the Sensitive Determination of Carcinoembryonic Antigen by Self-Supplied H2O2 Generation
Source: MDPI journal article supplement (doi:10.3390/bios12100830), 2022-10-06
Supplement: s1 [file s1]

*Electronic Supplementary Material*

# Polydopamine-Functionalized Copper Peroxide/ZIF-8 Nanoparticles-Based Fluorescence-Linked Immunosorbent Assay for Sensitive Determination of Carcinoembryonic Antigen by Self-Supplied H<sub>2</sub>O<sub>2</sub> Generation

Juanjuan Huang <sup>1,†</sup>, Yiyun Yao <sup>1,†</sup>, Yanling Chen <sup>1</sup>, Tianran Lin <sup>1</sup>, Li Hou <sup>1,\*</sup> and Dianping Tang <sup>2,\*</sup>

## Table of Contents:

### 1. Supporting Figures and Tables:

Figure S1. EDS mapping element analysis diagram of ZIF-8.

Figure S2. EDS mapping element analysis diagram of CP/ZIF-8.

Figure S3. Fluorescence intensity of FLISA platform with and without CEA.

Table S1. Comparison of analytical performance for CEA determination by using different sensing methods.

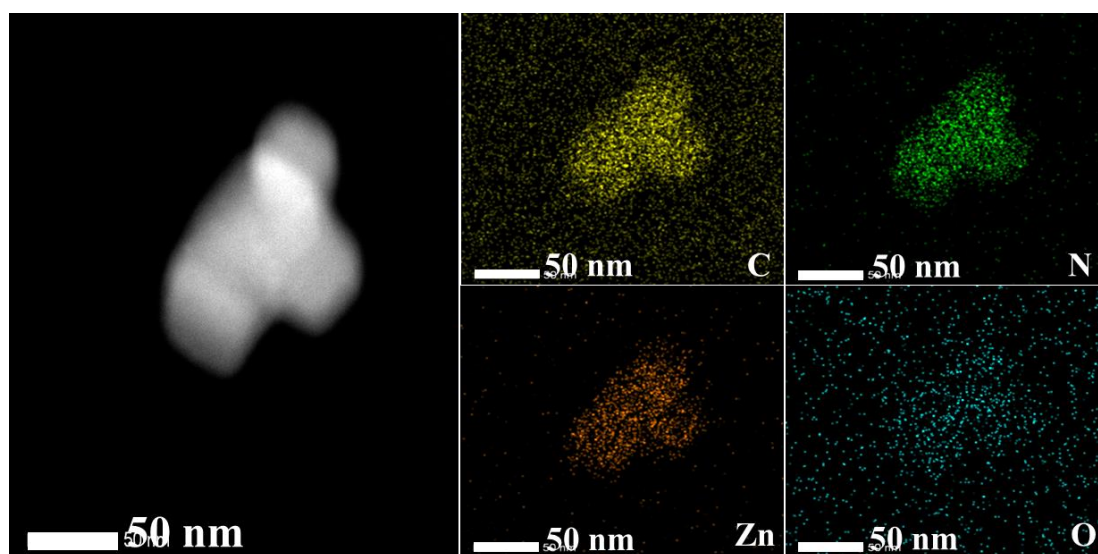

**Figure S1.** EDS mapping element analysis diagram of ZIF-8.

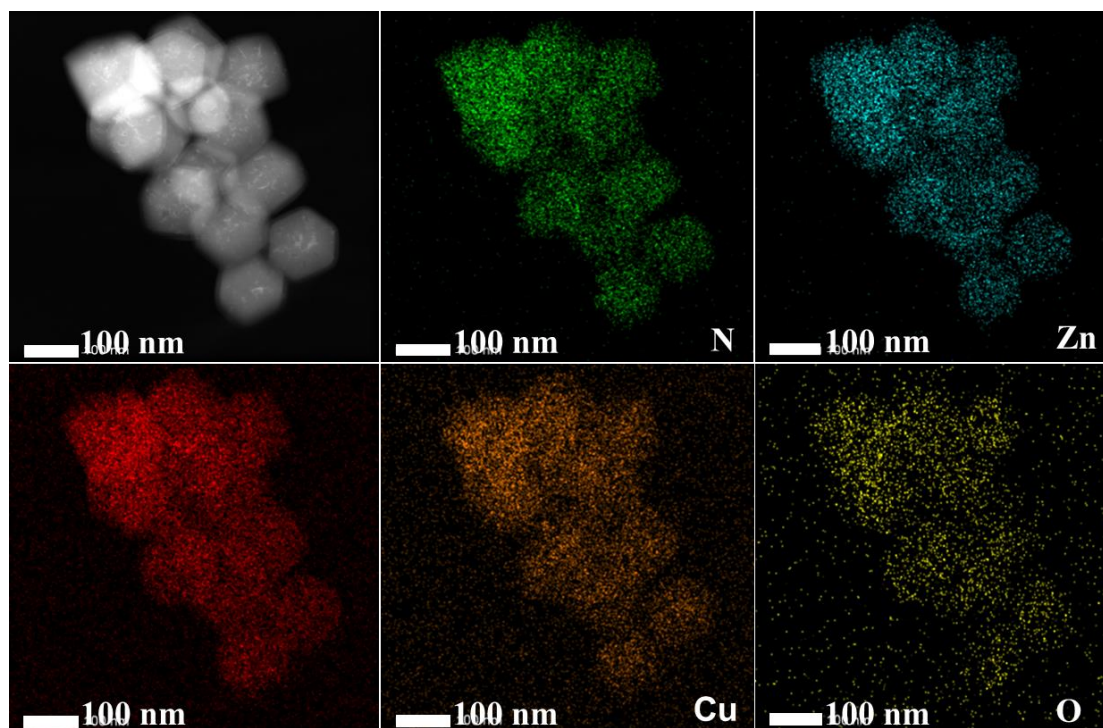

Figure S2. EDS mapping element analysis diagram of CP/ZIF-8

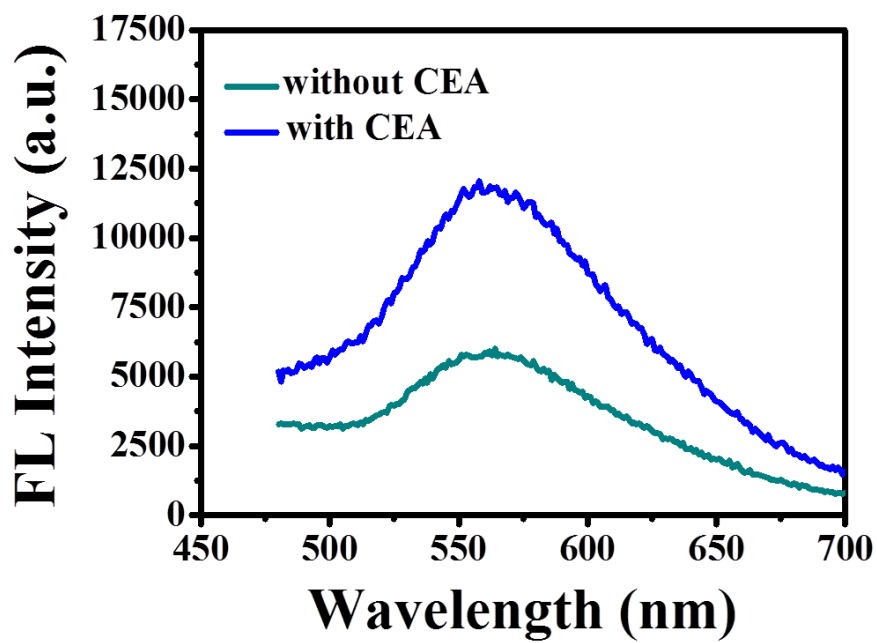

Figure S3. Fluorescence intensity of FLISA platform with and without CEA.

**Table S1.** Comparison of analytical performance for CEA determination by using different sensing methods.

| Method                       | Recognition/Sensing elements                                          | Linear range (ng mL <sup>-1</sup> ) | Limit of detection (pg mL <sup>-1</sup> ) | Reference |
|------------------------------|-----------------------------------------------------------------------|-------------------------------------|-------------------------------------------|-----------|
| Electrochemical              | Concanavalin/ANCMs@Fe <sub>3</sub> O <sub>4</sub> @Cusilicate         | 0.03-6                              | 5.38                                      | [1]       |
| Electrochemiluminescence     | Antibody/Co <sub>3</sub> O <sub>4</sub> NRs/luminol                   | 0.005-500                           | 2.9                                       | [2]       |
| Scanning electron microscope | Antibody/gold nanoparticle                                            | 0.1-80                              | 30                                        | [3]       |
| pH-Based immunoassay         | Antibody/glucose oxidase loaded gold hollow microsphere               | 0.1-100                             | 62                                        | [4]       |
| Fluorescence                 | Antibody/alkaline phosphatase                                         | 0.25-30                             | 80                                        | [5]       |
| Fluorescence                 | Aptamer/Texas Red/molybdenum disulfide                                | 0.1-100                             | 10                                        | [6]       |
| Fluorescence                 | Aptamer/glucose loaded mesoporous silica nanocontainers/CdTe/CdSe QDs | 0.05-20                             | 6.7                                       | [7]       |
| Fluorescence                 | CuO <sub>2</sub> /ZIF-8/polydopamine / Aptamer                        | 0.01-20                             | 7.6                                       | This work |

## References

- Zheng, J.; Wang, J.P.; Song, D.D.; Xu, J.L.; Zhang, M. Electrochemical aptasensor of carcinoembryonic antigen based on concanavalin a-functionalized magnetic copper silicate carbon microtubes and gold-nanocluster-assisted signal amplification. *ACS Appl. Nano Mater.* **2020**, *3*, 3449-3458. <https://doi.org/10.1021/acsanm.0c00194>
- Tang, Y.; Zhang, B.H.; Wang, Y.; Zhao, F.Q.; Zeng, B.Z. Electrochemiluminescence immunosensor for the detection of carcinoembryonic antigen based on oxygen vacancy-rich Co<sub>3</sub>O<sub>4</sub> nanorods and luminol. *ACS Appl. Nano Mater.* **2021**, *4*, 7264-7271. <https://doi.org/10.1021/acsanm.1c01240>
- Zhou, X.; Yang, C.T.; Xu, Q.S.; Lou, Z.C.; Xu, Z.F.; Thierry, B.; Gu, N. Gold nanoparticle probe-assisted antigen-counting chip using SEM. *ACS Appl. Mater. Interfaces*. **2019**, *11*, 6769-6776. <https://doi.org/10.1021/acsami.8b19055>
- Jiang, Y.; Su, Z.Y.; Zhang, J.; Cai, M.J.; Wu, L.L. A novel electrochemical immunoassay for carcinoembryonic antigen based on glucose oxidase-encapsulated nanogold hollow spheres with a pH meter readout. *Analyst* **2018**, *143*, 5271-5277. <https://doi.org/10.1039/C8AN01436A>
- Fan, Y.C.; Lv, M.M.; Xue, Y.; Li, J.; Wang, E.K. In situ fluorogenic reaction generated via ascorbic acid for the construction of universal sensing platform. *Anal. Chem.* **2021**, *93*, 6873-6880. <https://doi.org/10.1021/acs.analchem.1c00967>
- Xu, S.H.; Feng, X.Y.; Gao, T.; Liu, G.F.; Mao, Y.N.; Lin, J.H.; Yu, X.J.; Luo, X.L. Aptamer induced multicoloured Au NCs-MoS<sub>2</sub> "switch on" fluorescence resonance energy transfer biosensor for dual color simultaneous detection of multiple tumor markers by single wavelength excitation. *Anal. Chim. Acta* **2017**, *983*, 173-180. <https://doi.org/10.1016/j.aca.2017.06.023>
- Qiu, Z.L.; Shu, J.; Tang, D.P. Bioresponsive release system for visual fluorescence detection of carcinoembryonic antigen from mesoporous silica nanocontainers mediated optical color on quantum dot-enzyme-impregnated paper. *Anal. Chem.* **2017**, *89*, 5152-5160. <https://doi.org/10.1021/acs.analchem.7b00989>
